# Supplementary material for: PAK5-mediated AIF phosphorylation inhibits its nuclear translocation and promotes breast cancer tumorigenesis
Source: PubMed Central journal article supplement (PMC8040471; doi:10.7150/ijbs.58102), 2021-03-27
Supplement: ijbsv17p1315s1.pdf [file ijbsv17p1315s1.pdf]

Supplement table 1: Comparison of expression levels of PAK5 and AIF with tumor stage in breast cancer samples.

| Factor | Tumor stage |               | P value        |
|--------|-------------|---------------|----------------|
|        | I (n=25)    | II/III (n=50) |                |
| PAK5   |             |               | <b>0.011*</b>  |
| Low    | 14          | 13            |                |
| High   | 11          | 37            |                |
| AIF    |             |               | <b>0.002**</b> |
| Low    | 18          | 17            |                |
| High   | 7           | 33            |                |

\*Indicated statistical significance ( $P < 0.05$ ).

\*\*Indicated statistical significance ( $P < 0.01$ ).

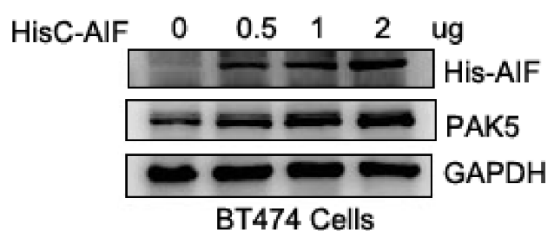

Supplement figure 1: Overexpression of AIF upregulates PAK5. BT474 cells transiently expressing different doses of HisC-AIF were analyzed with the indicated antibodies via Western blotting.

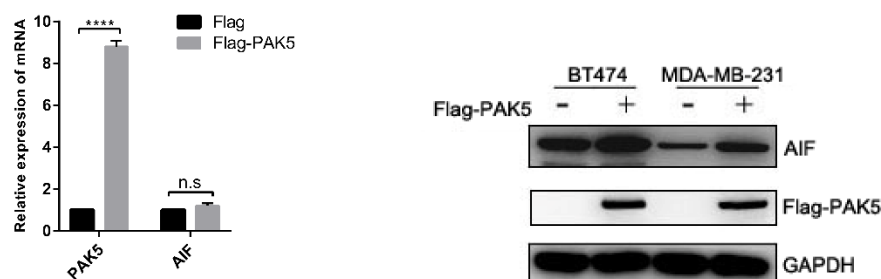

Supplement figure 2: Overexpression of PAK5 upregulates AIF at protein level. BT474 cells were stably overexpressed Flag-PAK5 and analyzed AIF expression at transcription level(left). BT474 cells and MDA-MB-231 cells were stably overexpressed Flag-PAK5 and analyzed with the indicated antibodies via Western blotting(right).

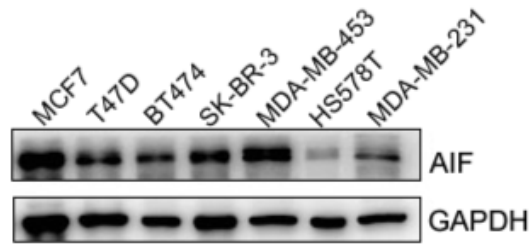

Supplement figure 3: Analysis of AIF protein expression level in breast cancer cell lines.

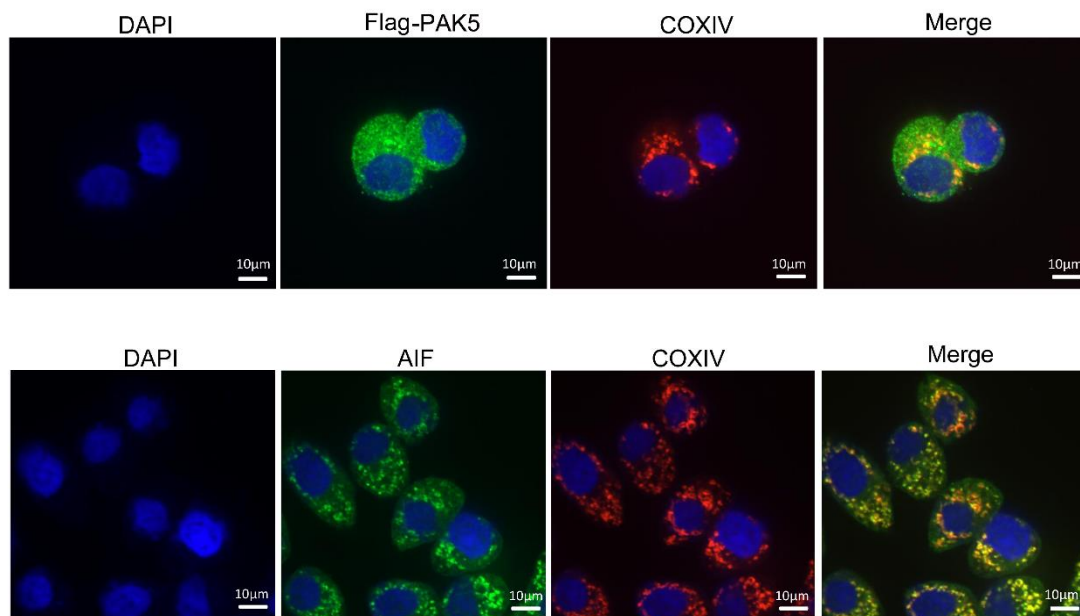

Supplement figure 4: Co-localization of Flag-PAK5, AIF and COXIV. COXIV is a mitochondrial protein. Alexa Fluor 488 (green) or Alexa Fluor 546 (red) was used to detect Flag-PAK5, AIF and COXIV respectively; nucleus was stained with DAPI (4', 6 diamidino-2-phenylindole). Yellow indicates co-localization. Original magnification,  $\times 600$ .

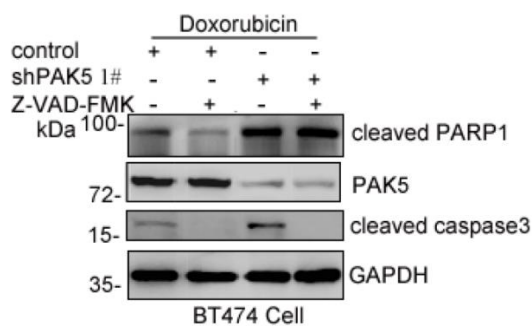

Supplement figure 5: BT474 cells transfected with the indicated constructs were exposed to 0.5 $\mu$ M Doxorubicin and 10 $\mu$ M Z-VAD-FMK for 12 hr in culture medium. Western

blotting was performed with the indicated antibodies.

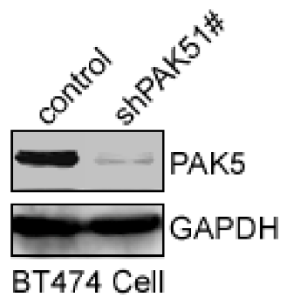

Supplement figure 6: BT474 cells infected with PAK5-RNAi lentivirus. PAK5 protein expression in the cells was detected by western blot. GAPDH served as protein loading control.

| Predicted Sites |      |                     |                           |       |        |
|-----------------|------|---------------------|---------------------------|-------|--------|
| Position        | Code | Kinase              | Peptide                   | Score | Cutoff |
| 209             | S    | STE                 | SIYFQPPS <b>F</b> YVSAQD  | 0.886 | 0.744  |
| 304             | T    | STE                 | SREVKSI <b>T</b> IIGGGFL  | 0.789 | 0.744  |
| 391             | T    | STE                 | KDGRKVE <b>T</b> DHIVAAV  | 1.25  | 0.744  |
| 480             | S    | STE                 | AKPYWHQ <b>S</b> MFWSDLG  | 0.991 | 0.744  |
| 526             | T    | STE                 | SATEQSG <b>T</b> GIRSESE  | 1.259 | 0.744  |
| 532             | S    | STE                 | GTGIRSE <b>S</b> ETSEAS   | 0.855 | 0.744  |
| 547             | T    | STE                 | EITIPFS <b>T</b> PVFPQAP  | 0.899 | 0.744  |
| 249             | S    | STE/STE20           | MVKLNDG <b>S</b> QIITYEKC | 1.198 | 1.173  |
| 281             | T    | STE/STE20           | GAEVKSR <b>T</b> ILFRKIG  | 2.203 | 1.173  |
| 521             | T    | STE/STE20           | QDNPKSA <b>T</b> EQSGTGI  | 1.581 | 1.173  |
| 202             | S    | STE/STE20/PAKB      | QWNGKRS <b>I</b> YFQPPS   | 6.3   | 3.44   |
| 268             | S    | STE/STE20/PAKB      | GGTFRSL <b>S</b> AIDRAGA  | 3.9   | 3.44   |
| 292             | S    | STE/STE20/PAKB      | RKIGDFR <b>S</b> LEKISRE  | 4.8   | 3.44   |
| ★ 202           | S    | STE/STE20/PAKB/PAK5 | QWNGKRS <b>I</b> YFQPPS   | 10    | 4.45   |
| 209             | S    | STE/STE20/PAKB/PAK5 | SIYFQPPS <b>F</b> YVSAQD  | 4.5   | 4.45   |
| 266             | S    | STE/STE20/PAKB/PAK5 | ATGGTFRSL <b>S</b> AIDRA  | 6     | 4.45   |
| ★ 281           | T    | STE/STE20/PAKB/PAK5 | GAEVKSR <b>T</b> ILFRKIG  | 7.25  | 4.45   |
| 292             | S    | STE/STE20/PAKB/PAK5 | RKIGDFR <b>S</b> LEKISRE  | 4.5   | 4.45   |

Supplement figure 7: GPS software predicted the phosphorylation sites of AIF by PAK5.

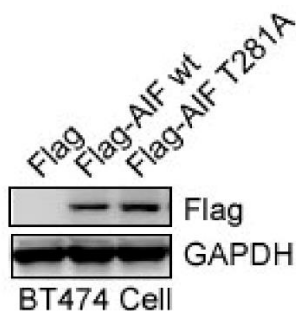

Supplement figure 8: BT474 cells transfected with the indicated constructs and the transfection efficiency of the plasmid was detected by Western blot.
